# Supplementary material for: Current status and future prospects of stem cell therapy in Alzheimer’s disease
Source: PubMed Central journal article supplement — Neural Regen Res. 2019 Sep 24;15(2):242–50. doi: 10.4103/1673-5374.265544 (PMC6905342; doi:10.4103/1673-5374.265544), 2019-09-24
Supplement: NRR-15-242_Suppl1.pdf [file NRR-15-242_Suppl1.pdf]

## OPEN PEER REVIEW REPORT 1

**Name of journal:** Neural Regeneration Research

**Manuscript NO:** NRR-D-19-00028

**Title:** Current status and future prospects of stem cells therapy in Alzheimer's disease

**Reviewer's Name:** Wipawan Thangnipon

**Reviewer's country:** Thailand

**Date sent for review:** 2019-01-22

**Date reviewed:** 2019-02-07

### COMMENTS TO AUTHORS

This is a very interesting review.

There are a few points should be addressed as follows:

1. On page 1, lines 46-48, it will be better if the authors would mention the hallmarks feature of AD started with " accumulation of extracellular  $\beta$ -amyloid ( $A\beta$ ) in senile plaques.....and followed with " intracellular deposition of NFTs....."
2. On page 4, lines 17-29, I think they should include adverse effects of those drugs such as allopregnanolone, apigenin, daucosterol and fluoxetine.
3. On page 9, 4.4. iPSCs, could they update/add some data about using *C. elegans* as in vivo AD model for stem cell therapy?
