# Supplementary material for: Current status and future prospects of stem cell therapy in Alzheimer’s disease
Source: PubMed Central journal article supplement — Neural Regen Res. 2019 Sep 24;15(2):242–50. doi: 10.4103/1673-5374.265544 (PMC6905342; doi:10.4103/1673-5374.265544), 2019-09-24
Supplement: NRR-15-242_Suppl2.pdf [file NRR-15-242_Suppl2.pdf]

## OPEN PEER REVIEW REPORT 2

**Name of journal:** Neural Regeneration Research

**Manuscript NO:** NRR-D-19-00028

**Title:** Current status and future prospects of stem cells therapy in Alzheimer's disease

**Reviewer's Name:** Bruno Vincent

**Reviewer's country:** Thailand

**Date sent for review:** 2019-01-22

**Date reviewed:** 2019-02-05

### COMMENTS TO AUTHORS

This manuscript presents and discusses the current status and prospective possible use of stem cells to combat Alzheimer's disease.

This review is undoubtedly of substantial interest in the field of neurodegenerative disorders and provides some new and original tracks aim at fighting this devastating neurological disorder. I have no particular comment to make as to the font of the manuscript except the gross error that appears in Figure 1 (see #3). However, the form must be improved in a substantial way as underlined by the following remarks:

#1- The plasma membrane is not positioned properly regarding the APP sequence in Figure 1 (it should encompass the g-site). This is a serious issue and correction is mandatory.

#2- The fact that the non-amyloidogenic bAPP-derived metabolite sAPP $\alpha$  conveys some well-established pro-neurogenic effects (Ohsawa et al., 1999 *Eur. J. Neurosci.* 11, 1907-1913; Caille et al., 2004 *Development* 131, 2173-2181; Gakhar-Koppole et al., 2008 *Eur. J. Neurosci.* 28, 871-882) has to be somehow emphasized in regards with the topic of the present review.
